# Supplementary material
Source: Springer Nature journal article supplement (https://www.springermedizin.de/resource/supplementary/12990_2009_255_MOESM2_ESM.pdf/9612894)

**$\beta$ -GAL-MIDGE-NLS**  
 **$\beta$ -GAL staining**

**POMC-MIDGE-NLS**  
**END staining**

**Control MIDGE-NLS**  
**END staining**

**Noninflamed paw**

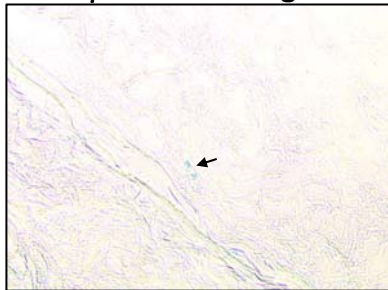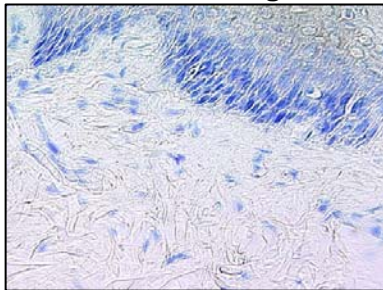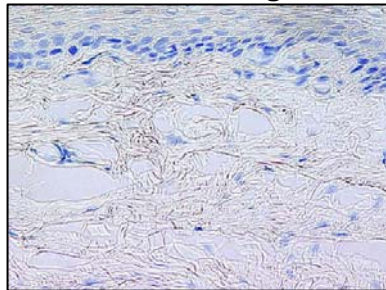

**Inflamed paw**

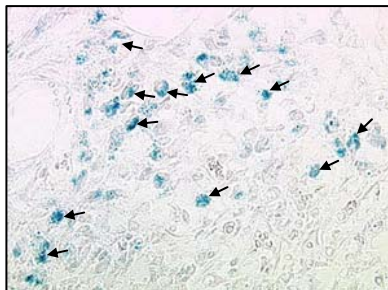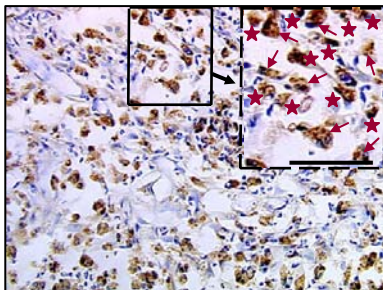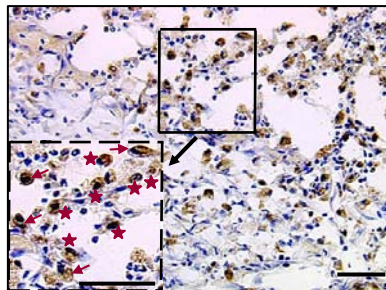

Supplement: MOESM2 [file 9612894]
